1 **Metabolomic Alterations in Crimean Congo Hemorrhagic Fever**  
2 **Explored Through a Nationwide Study Using NMR Spectroscopy**

3 *Oktay Göcenler<sup>1,#</sup>, Kerem Kahraman<sup>1,#</sup>, Derya Yapar<sup>2,3</sup>, Yaren Kahraman<sup>1</sup>, Cengizhan*  
4 *Büyükdağ<sup>1</sup>, Gülen Esken<sup>4</sup>, Serena Ozabrahamyan<sup>5</sup>, Tayfun Barlas<sup>4</sup>, Yüksel Karadağ<sup>3</sup>, Aysel*  
5 *Kocagül Çelikbaş<sup>2,3</sup>, Füsun Can<sup>4,6</sup>, Nurcan Baykam<sup>2,3</sup>, Mert Kuşkucu<sup>4,7</sup>, Önder Ergönül<sup>4,7</sup>,*  
6 *Çağdaş Dağ<sup>1, 4,\*</sup>*

7 <sup>1</sup>Nanofabrication and Nanocharacterization Center for Scientific and Technological Advanced  
8 Research (n<sup>2</sup>STAR), Koç University, İstanbul, Türkiye

9 <sup>2</sup>Hitit University, School of Medicine, Çorum, Türkiye

10 <sup>3</sup>Department of Infectious Diseases and Clinical Microbiology, Çorum Erol Olçok Training and  
11 Research Hospital, Çorum, Türkiye

12 <sup>4</sup>Koç University Isbank Center for Infectious Diseases (KUISCID), Koc University, Istanbul,  
13 Türkiye

14 <sup>5</sup>The Ohio State University Wexner Medical Center, Columbus, USA

15 <sup>6</sup>Koç University School of Medicine, Department of Medical Microbiology, Istanbul, Türkiye

16 <sup>7</sup>Koç University School of Medicine, Department of Clinical Microbiology and Infectious  
17 Diseases, Istanbul, Türkiye

18

19 \*Corresponding author: [cdag@ku.edu.tr](mailto:cdag@ku.edu.tr)

20 #equal contribution

21

22

## 23 **SUMMARY**

24 Crimean-Congo Hemorrhagic Fever (CCHF) is a severe tick-borne viral disease with high  
25 mortality rates and significant public health implications. Despite its global prevalence, the  
26 mechanisms underlying its pathogenesis remain poorly understood, and effective diagnostic and  
27 therapeutic tools are limited. Metabolomics, as a powerful tool for exploring host-pathogen  
28 interactions, offers a promising avenue for identifying biomarkers and elucidating disease  
29 mechanisms. In this study, we investigated the metabolic alterations in CCHF patients using non-  
30 targeted metabolomics to enhance understanding of disease pathogenesis, improve diagnostic  
31 capabilities, and identify potential therapeutic targets. A nationwide analysis was conducted on  
32 the blood serum of 29 CCHF patients and 10 healthy controls, employing Nuclear Magnetic  
33 Resonance (NMR) spectroscopy. Serum samples were collected over four consecutive days, and  
34 metabolic profiling was performed using Partial Least Squares Discriminant Analysis (PLS-DA)  
35 and Variable Importance in Projection (VIP) scoring to identify key metabolic pathways and  
36 compounds. Significant disruptions in metabolic pathways were observed in CCHF patients,  
37 particularly in purine and pyrimidine metabolism, the TCA cycle, and redox-related processes.  
38 Elevated levels of metabolites such as S-adenosyl homocysteine (SAH), guanosine triphosphate  
39 (GTP), inosine monophosphate (IMP), adenosine monophosphate (AMP), carnosine, 2'-  
40 deoxyuridine, nicotinamide adenine dinucleotide phosphate (NADP+), and maleate were  
41 identified. These metabolites demonstrated potential as biomarkers for disease severity and  
42 progression, with distinct metabolic profiles observed between moderate and severe cases. This  
43 study provides the first comprehensive metabolomic analysis of CCHF, highlighting critical  
44 metabolic pathways disrupted during infection. The findings underscore the utility of NMR-  
45 based metabolomics for identifying biomarkers that facilitate early diagnosis, prognosis, and

46 therapeutic development. These results pave the way for future research to validate the identified  
47 biomarkers and explore targeted treatment strategies to improve patient outcomes in this severe  
48 viral infection.

## 49 **1. Introduction**

50 Crimean-Congo Hemorrhagic Fever (CCHF) is a severe viral infection with substantial  
51 implications for public health in a wide range of countries in Asia, Africa, Southern Europe and  
52 the Middle East. CCHF is caused by CCHF virus (CCHFV) belonging to the genus of  
53 Orthonairovirus, and the family of Nairoviridae being one of deadliest viruses of its kind with  
54 reported mortality rate of 3-30% (1). CCHFV is transmitted to humans through tick bites of  
55 infected ticks, contact with blood or tissues of infected livestock, or contact with infected  
56 patients (2). The exact course of pathogenesis of CCHF is not clearly known however it is  
57 divided into four phases: incubation, pre-haemorrhagic, haemorrhagic and convalescence [2].  
58 CCHF is classified as a severe hemorrhagic fever with a short incubation period of 1-3 days  
59 although longer incubation periods have been documented [3]. The onset of infection is often  
60 sudden and includes symptoms, fever, diarrhea, vomiting, nausea, myalgia, back and abdominal  
61 pain followed by an hemorrhagic phase where severe bruises, uncontrollable bleeding at the  
62 body orifices are observed and in severe cases, deterioration of kidneys, liver and lungs [4].  
63 Deaths associated with the infection mostly occur between 5-14 days from the start of the  
64 viremic phase [5]. In terms of treatment, early hospitalizations and early administration of  
65 therapeutics are shown to reduce both severity and mortality of CCHF [6]. Hence, lack of early  
66 detection of CCHF is one of the leading factors causing the particular high mortality rate of  
67 CCHF.

68 There are several challenges of diagnosing CCHF infection particularly before the hemorrhagic  
69 phase of the infection and patients who are not suspected of being bitten by infected ticks or  
70 contacted with infected livestock. CCHF is comparatively uncommon in specific regions, which  
71 may lead healthcare providers to initially overlook it as a potential diagnosis. Likewise, there are  
72 documented cases of difficulties diagnosing CCHF, both because of the latter but also the  
73 absence of a universally applicable diagnostic kit for surveillance and diagnosis of all CCHFV  
74 strains [7]. Standard blood tests such as hemogram, biochemical analysis and physical  
75 examination at the beginning of hospitalization is applied on all patients who are suspected to be  
76 infected with CCHF although the results are often relevant for short term prognostic factors as  
77 biochemical values change often quickly. For more comprehensive and standard diagnostic  
78 methods, viral antigen and nucleic acid amplification tests are employed [8]. The initial  
79 symptoms of CCHF, such as fever, headache, and muscle aches, are rather non-specific hence  
80 diagnosing CCHF early by differential diagnosis can be difficult [5]. However biomarkers,  
81 essentially biomolecules, may provide a measure of specific diseases or their stages due to their  
82 varying concentrations. Bio markers are instrumental in diagnosing and monitoring the  
83 progression of viral infections. The associated changes in their levels, often indicative of the  
84 disease, are typically attributed to the host's immune reaction and the disturbance of key  
85 biochemical routes in reaction to the infectious process. In this sense, omics studies and  
86 biomarkers could be used for both analysis and diagnosis of CCHF and for characterizing better  
87 treatment strategies of hospitalized patients swiftly is crucial to pinpoint optimal treatment  
88 strategies for treating CCHF [9].

89 So far there is only one omics study which investigates host-viral response and pathogenesis of  
90 CCHF utilizing transcriptomics and proteomics methods [10]. Led by this gap in the literature,

91 we conducted a nationwide analysis of metabolomes of patients hospitalized due to CCHF.  
92 Turkey has over 10,000 cases of CCHF with an average fatality rate of 5%, making it a critical  
93 public health concern affecting people living in rural areas as ticks are widespread in these  
94 regions [11]. In our present investigation, we employed Nuclear Magnetic Resonance (NMR)  
95 spectroscopy exploratory metabolomics to investigate the overall temporal variations in plasma  
96 metabolites during a seasonal outbreak of CCHF infection. We employed PLS-DA statistical  
97 analysis of the blood serum metabolome of CCHF patients and categorized certain metabolomes  
98 linked to metabolic dysregulation caused by CCHF. Preliminary results from our study suggest  
99 that specific metabolic markers can be identified in the serum of CCHF patients pointing to  
100 metabolic dysregulation, which may allow for earlier diagnosis and more targeted treatment  
101 strategies. Additionally, being the first study to categorize alterations of patient metabolome  
102 during CCHF viremic phase may be valuable for efforts to develop therapeutics or targeted  
103 treatment strategies to reduce the severity and high mortality rate of CCHF.

## 104 **2. Materials and methods**

### 105 **Monitoring of CCHF diagnosed patients and collection of the samples from the patients:**

106 Patients who were diagnosed with CCHF were selected from Çorum Hitit University Hospital.  
107 The first sample collection was conducted in April 2022, and blood samples were collected daily  
108 using Ethylenediaminetetraacetic acid (EDTA) tubes. In current metabolomics studies, opinions  
109 regarding the appropriate determination of sample size can considerably vary. However,  
110 numerous statistical analyses have underscored that a substantial sample size, for achieving  
111 meaningful results, around 30 samples [12]. In this study, serum specimens were procured from  
112 29 patients (n=29) diagnosed with CCHFV infection, as well as from 10 healthy control group.  
113 CCHF patients also admitted to the hospital with an infection diagnosis were subclassified into

114 two categories based on their blood test values and symptoms: moderate (n=24) and severe  
115 (n=5). Four blood serum samples from patients each consecutive day (n=116 samples) and a  
116 single sample from the control group (n=10 samples) was taken. These blood samples were then  
117 subjected to centrifugation for 5 minutes at 3000g to separate the sample into plasma, white  
118 blood cell, and red blood cell phases. The plasma phase was extracted and subjected to  
119 metabolite extraction using multiple approaches: single methanol extraction, triple alcohol  
120 extraction, Methanol-chloroform, Acetone, Acetonitrile, and Ultrafiltration. Cold methanol-  
121 chloroform was chosen as the most effective extraction and used for extraction of all samples.  
122 Only the polar metabolites in the plasma were investigated, while proteins and apolar compounds  
123 were removed from the plasma samples. Overall in this study, we utilized a rigorous approach to  
124 sample collection, preparation, and analysis to investigate polar metabolites in the plasma of  
125 CCHF patients [13].

126 **Ethical Statement:** The study was approved by Koç University Committee on Human Research  
127 (01.12.2021/ 2021.436.IRB2.079) and all the procedures performed in this study involving  
128 human participants were in accordance with the ethical standards of the institutional research  
129 committee ethical standards. A written informed consent was obtained from all patients.

130 **NMR sample preparation:** 4 mL ice-cold methanol-chloroform (1:1) mixture was added to 2  
131 mL serum for methanol-chloroform extraction. The mixture was vortexed for 30 seconds and  
132 incubated for 10 minutes on ice. After incubation the mixture was centrifuged at 4500g at 4°C  
133 for 30 minutes. The methanol phase was collected and dried using a vacuum concentrator. The  
134 dried samples were dissolved in 550 uL D<sub>2</sub>O based NMR sample solution (50 mM PBS (pH 7.4),  
135 20mM NaCl, 1 mM DSS) for standardized sample preparation.

136 **NMR data collection, processing and statistical analysis:** 500 MHz Bruker Ascend magnet  
137 with BBO paired resonance probe and Avance NEO console was used for NMR data collection.  
138 1D NOESY-presat (noesygppr1d) pulse sequence was used for data collection. Each NMR data  
139 spectrum is composed of 4K screening and 32K complex data points. Spectrum widths were set  
140 to 9615.4 Hz. Bruker Topspin 4.2.0 software was used for NMR data processing. Data was  
141 divided into 0.02 ppm data packages along with their normalization coefficients. The dataset,  
142 which comprises data packets with a resolution of 0.02 ppm, was analyzed using the  
143 MetaboAnalyst 5.0 online metabolomics statistical analysis software. Henceforth the data will  
144 be referred to as (Bin.x.xx [ppm]) data packets and the day of when sample was taken. All data  
145 points were normalized using the average centering normalization method. Following this  
146 normalization, the dataset underwent statistical analysis using Partial Least Squares Discriminant  
147 Analysis (PLS-DA). PLS-DA is a classification and discrimination technique based on the  
148 Partial Least Squares (PLS) regression method. This method is widely utilized to determine the  
149 differences between classes, particularly in high-dimensional and multivariate datasets. PLS-DA  
150 is a commonly employed method in analyzing complex biological systems, such as  
151 metabolomics studies. The VIP Projection variable importance score plot is a graph that is  
152 utilized to assess the outcomes of PLS-DA and determine the most significant variables in the  
153 analysis. VIP scores quantify the importance of each variable (e.g., metabolites) in classification  
154 and aid in identifying the most critical features. VIP scores are computed based on the  
155 contribution of each variable to the components (latent variables) in the PLS-DA model. The  
156 values begin at 1, and higher VIP scores indicate that the variable is more important for  
157 classification. Variables with VIP scores greater than 1 are generally deemed significant,  
158 although this threshold may vary in practice. The VIP score plot displays the VIP scores of the

159 variables on the vertical axis, while the variables themselves or their indices are shown on the  
160 horizontal axis. This graph facilitates the identification of important variables visually and helps  
161 focus on the variables that require prioritization in the analysis. In the VIP score graph, the peaks  
162 at the relevant ppm values that make up the data packages (Bin.x.xx) have been examined in  
163 more detail and the metabolites to which they belong have been identified. For this operation,  
164 NMR spectra have been reopened, and the metabolites to which the peak in the relevant ppm  
165 region belongs have been determined using the Chenomx software. It is thought that some peaks  
166 might belong to metabolites not found in the database, and the molecules these peaks belong to  
167 have not been identified. Further investigation and characterization may be required to fully  
168 understand these unidentified peaks and their role in the overall metabolic profile, ensuring that  
169 the final analysis provides an accurate reflection of the biological system under investigation.

170 **Metabolomic pathway visualization:** All metabolic pathways visualized using Metastate  
171 software Version BETA (<https://metastate.bio>) (Metastate Bio Inc.). Metastate algorithm  
172 employs the Kyoto Encyclopedia of Genes and Genomes (KEGG) database as its foundational  
173 input source. Software systematically retrieves details pertaining to biological pathways,  
174 chemical compounds, and molecular reactions of interest. Software curates and assembles a  
175 dynamic graphical representation of the data.

### 176 **3. Results**

177 In this study, 29 patients diagnosed with Crimean-Congo Hemorrhagic Fever (CCHF) and 10  
178 healthy individuals serving as control subjects were included. The control group had a mean age  
179 of 50.1 years (range: 40–64 years), while the CCHF patient group had a slightly higher mean age  
180 of 50.5 years, with a wider age range of 22–77 years. A total of 126 blood samples were



181 collected for analysis. Serum samples were prepared using methanol extraction, followed by  
182 Nuclear Magnetic Resonance (NMR) spectroscopy. The metabolite profiles obtained were  
183 subjected to comprehensive statistical analysis. This analysis incorporated data from all collected  
184 samples over four consecutive days and categorized them into moderate, severe, and control  
185 groups for comparative evaluation. Detailed procedures are described in the Materials and  
186 Methods section.

187 Partial Least Squares Discriminant Analysis (PLS-DA) was employed to develop a model  
188 incorporating the primary components (latent variables) of the dataset. The model focused on the  
189 first five components, which were pivotal for data classification and accounted for most of the  
190 dataset's variance. The corresponding score plots, presented as two-dimensional graphs, illustrate  
191 the pairwise comparisons of these components (Figure 1a).

192 The PLS-DA score plot (Figure 1b) clearly differentiates between healthy and diseased  
193 individuals. PLS-DA, well-suited for handling high-dimensional data, effectively identifies the  
194 key variables responsible for distinguishing health states. This approach revealed a distinct  
195 separation based on variations and correlations within the biomarker data. To further explore the  
196 critical contributors to this separation, the Variable Importance in Projection (VIP) scores were  
197 analyzed. The PLS-DA VIP score plot (Figure 1c) highlights the variables with the most  
198 significant influence on the discrimination process, with the top 15 variables identified. VIP  
199 scores provide insights into the relevance of each variable, aiding in the identification of  
200 biomarkers that significantly differ between healthy and diseased states.

201 Figure 1c demonstrates that some data buckets exhibit lower concentration values (indicated in  
202 blue) in the control group, which progressively increase over time. Furthermore, the identified

203 compounds displayed a marked increase in concentration, as corroborated by enhanced signals  
204 from their respective data buckets (Figure 1d).

205 Statistical analysis was performed across three distinct groups, incorporating samples collected  
206 over four days from both patient groups. While patient samples were successfully distinguished  
207 from the control group, no significant differences were observed between the moderate and  
208 severe disease groups. Key metabolites found to be elevated in the patient groups compared to  
209 controls included SAH, GTP, carnosine, maleate, 2-deoxyuridine, IMP, AMP, and NADP+.

210 As a secondary approach to data analysis, metabolite profiles were evaluated using samples  
211 collected on days 1 and 2 of hospitalization, representing the early stages of infection. Patients  
212 were categorized into severe and moderate groups based on clinical severity, while blood  
213 samples from healthy individuals were used as the control group for statistical comparisons  
214 (Figure 2). This focused analysis aimed to investigate metabolite changes during the initial phase  
215 of the disease. In addition to compounds identified in the initial analysis, novel metabolites with  
216 significant increases on days 1 and 2 were detected, suggesting their potential involvement in the  
217 pathogenesis of Crimean-Congo Hemorrhagic Fever (CCHF).

218 A comprehensive metabolomic analysis of blood serum from CCHF patients revealed distinct  
219 metabolite patterns corresponding to infection severity. Partial Least Squares Discriminant  
220 Analysis (PLS-DA) score plots and Variable Importance in Projection (VIP) scores (Figure 3)  
221 highlighted notable differences in metabolite profiles between severe and moderate cases. In  
222 severe CCHF infections, metabolites such as AMP, IMP, and NAAD were significantly elevated  
223 in the serum, whereas these compounds were less prominent in samples from patients with

224 moderate infection. Conversely, GTP was markedly increased in the moderate infection group  
225 but was not significantly detected in the severe group.

226 Overall, these findings highlight substantial metabolic differences between moderate and severe  
227 CCHF infections, pointing to critical pathways potentially involved in CCHF pathogenesis.  
228 These results underscore the importance of early-stage metabolite profiling to enhance our  
229 understanding of disease mechanisms and identify potential biomarkers for severity  
230 stratification.

#### 231 **4. Discussion**

232  
233 In this study, we present the first non-targeted metabolomics analysis of Crimean-Congo  
234 Hemorrhagic Fever (CCHF) to enhance the understanding of its pathogenesis, improve  
235 diagnostic capabilities, and aid in the development of potential therapeutic interventions. Using  
236 Nuclear Magnetic Resonance (NMR) spectroscopy, we identified significant increases in key  
237 metabolites, including S-adenosyl homocysteine (SAH), guanosine triphosphate (GTP),  
238 carnosine, maleate, 2'-deoxyuridine (2'-dU), inosine monophosphate (IMP), adenosine  
239 monophosphate (AMP), and nicotinamide adenine dinucleotide phosphate (NADP+), in the  
240 blood serum of CCHF patients. These findings suggest that these metabolites may play critical  
241 roles in the pathogenesis of CCHF and serve as important biomarkers for early detection and  
242 monitoring of disease progression.

243 Metabolomics has emerged as a powerful tool for studying host-pathogen interactions by  
244 revealing metabolic alterations induced by viral infections. To date, only one prior omics study  
245 utilizing mass spectrometry (MS) has investigated the interaction between the host and CCHF

246 virus (CCHFV). Both NMR and MS are widely used in metabolomics, with each method  
247 offering distinct advantages depending on the research objectives. NMR spectroscopy is  
248 particularly suitable for non-targeted metabolomics due to its superior reproducibility, minimal  
249 sample preparation, and ability to analyze complex biofluids. It also provides consistent spectra  
250 across different instruments and laboratories, making it highly reliable for diagnostic and  
251 prognostic studies. On the other hand, MS offers higher sensitivity and is often preferred for  
252 targeted metabolomics studies.

253 The utility of NMR metabolomics has been demonstrated in the analysis of host metabolic  
254 changes induced by various viral infections, including HIV, dengue virus (DENV), and  
255 chikungunya virus. Moreover, metabolomics approaches have been successfully applied to study  
256 other viral hemorrhagic fevers, such as Ebola, Marburg, and dengue, yielding promising results  
257 for early diagnosis and prognosis prediction. Similarly, our findings underscore the potential of  
258 NMR metabolomics in elucidating the complex metabolic interactions between CCHFV and its  
259 host. The observed metabolic changes in CCHF patients offer new insights into the mechanisms  
260 of disease pathogenesis and highlight potential pathways for targeted therapeutic interventions.

261 By focusing on metabolite profiles in CCHF, this study demonstrates the value of NMR-based  
262 metabolomics in addressing the gaps in knowledge surrounding this severe disease. Our findings  
263 not only advance the understanding of CCHF pathogenesis but also provide a foundation for  
264 further research aimed at identifying effective biomarkers and therapeutic targets. These results  
265 emphasize the critical role of metabolomics in uncovering host-pathogen dynamics and  
266 improving clinical outcomes in viral infections.

267 Among the notable metabolites detected, S-adenosyl homocysteine (SAH) emerged as a  
268 significant intermediate in the metabolic pathways of CCHF patients. SAH, a precursor to  
269 homocysteine and adenosine, serves as the substrate for the enzyme SAH hydrolase, a critical  
270 component of the S-adenosylmethionine (SAM/AdoMet) regeneration cycle (Figure 4a).  
271 Elevated SAH levels were observed in CCHF patients early during hospitalization, underscoring  
272 its potential relevance in the disease's pathogenesis. This observation aligns with findings from a  
273 genomic study linking Methylenetetrahydrofolate reductase (MTHFR) polymorphisms to a  
274 predisposition for milder forms of CCHF [18]. Since MTHFR plays a central role in folate  
275 metabolism and methylation processes, these results suggest that disruptions in methylation  
276 pathways during the viremic phase could serve as prognostic indicators for CCHF severity.

277 SAM is a key methyl donor in various cellular methylation reactions, including those involved in  
278 5' RNA capping, a process critical for viral replication and transcription [19]. Evidence from  
279 other viral families, such as flaviviruses [20], and Ebola, whose L protein exhibits  
280 methyltransferase activity, indicates that methylation mechanisms can influence RNA cap  
281 structure and internal adenosine-2'-O-methylation [21]. These parallels highlight the potential  
282 importance of methylation pathways in CCHF pathogenesis. The additional complexity of RNA  
283 methylation in some viral families suggests that SAM-related domains within viral replication  
284 complexes could represent promising therapeutic targets.

285 Our findings emphasize the need for further research into SAM-related pathways to unravel their  
286 implications for viral replication and host-pathogen interactions in CCHF. These pathways not  
287 only provide insight into disease mechanisms but also present opportunities for the development  
288 of targeted therapeutic interventions, particularly those aimed at disrupting key methylation  
289 processes critical for viral survival.

290 GTP, AMP, and inosine monophosphate (IMP) are key nucleotides involved in purine  
291 metabolism, essential for energy production and nucleic acid synthesis (Figure 4b). Elevated  
292 levels of GTP and IMP are well-documented indicators of viral infections, particularly among  
293 viruses in the *Orthornavirae* kingdom. In the context of CCHF, the increase in these purine  
294 metabolites aligns with the known mechanism of action of broad-spectrum antivirals like  
295 Ribavirin. As a nucleotide analog, Ribavirin targets the substrate-binding site of the IMPDH  
296 enzyme, thereby reducing RNA synthesis in infected cells by downregulating GTP synthesis  
297 [22]. Monitoring these metabolites could provide valuable insights into the efficacy of antiviral  
298 treatments. Additionally, quantifying shifts in GTP and IMP concentrations offers a potential  
299 strategy to optimize therapeutic interventions in clinical trials, enhancing the effectiveness of  
300 antiviral agents targeting purine metabolism [23].

301 Carnosine ( $\beta$ -alanyl-L-histidine) (Figure 4c), a dipeptide with antioxidant, anti-glycation, and  
302 anti-inflammatory properties, was also significantly elevated in CCHF patients. Predominantly  
303 found in skeletal muscle and the brain, increased carnosine levels may reflect a compensatory  
304 response to oxidative stress, infection-induced cell death, or muscle mass reduction due to  
305 hospitalization. Carnosine has demonstrated antiviral potential against Zika, dengue, and SARS-  
306 CoV-2, reducing viral replication and alleviating symptoms. While its therapeutic utility against  
307 CCHF remains to be established, these findings highlight the need for further investigation into  
308 its potential as a treatment option.

309 2'-Deoxyuridine (2'-dU), an intermediate in thymidylate synthesis (Figure 4d), also showed  
310 significant elevation in CCHF patients. This metabolite, a precursor for DNA synthesis, plays a  
311 role in antiviral therapies, such as Edoxudine, which target DNA viruses [24–26]. Variants of 2'-  
312 dU, such as BVDU, have shown efficacy against Herpes simplex virus type 1 (HSV-1) and

313 varicella-zoster virus (VZV) [27]. While 2'-dU is typically associated with DNA virus activity,  
314 its elevated levels in CCHF patients may suggest broader disruptions in pyrimidine metabolism,  
315 potentially linked to the metabolic dysregulation observed in this study.

316 Nicotinamide adenine dinucleotide phosphate (NADP<sup>+</sup>) serves as a critical cofactor in enzymatic  
317 reactions, primarily within the pentose phosphate pathway, where it supports fatty acid synthesis  
318 and the regeneration of reduced glutathione. Its role in redox reactions also underscores its  
319 importance in the antioxidant defense system. Elevated NADP<sup>+</sup> levels in CCHF patients could  
320 reflect increased metabolic activity related to energy production and nucleotide synthesis. This  
321 hypothesis is further supported by the observed overlap in the elevations of NADP<sup>+</sup>, GTP, IMP,  
322 and AMP, indicating a coordinated upregulation of energy metabolism pathways. The significant  
323 increase in these metabolites in severe cases (Figure 3) underscores their potential relevance in  
324 disease progression and severity.

325 Maleate (cis-butenedioic acid), a dicarboxylic acid and trans-isomer of fumaric acid, plays a role  
326 in nicotinate and nicotinamide metabolism [29]. Elevated maleate levels in CCHF patients  
327 suggest underlying metabolic disruptions. Previous studies have demonstrated that maleate can  
328 inhibit the tricarboxylic acid (TCA) cycle, lower ATP levels, and impair enzymatic activity,  
329 leading to systemic metabolic imbalances. These findings warrant further investigation into the  
330 potential implications of maleate in the pathophysiology of CCHF [30].

331 In summary, these metabolomic findings reveal significant disruptions in purine, pyrimidine, and  
332 energy metabolism pathways in CCHF patients. Metabolites such as GTP, IMP, AMP, carnosine,  
333 2'-dU, NADP<sup>+</sup>, and maleate provide valuable insights into the pathogenesis of the disease and  
334 highlight potential biomarkers for disease progression and therapeutic targets.

335

336

337

## 338 **Conclusion**

339 In this study, we conducted a nationwide analysis of blood serum metabolites from patients  
340 hospitalized due to Crimean-Congo Hemorrhagic Fever (CCHF), employing Nuclear Magnetic  
341 Resonance (NMR) spectroscopy as a novel approach to investigate host-pathogen interactions  
342 and the pathogenesis of CCHFV. Our findings revealed significant alterations in several key  
343 metabolites, including S-adenosyl homocysteine (SAH), guanosine triphosphate (GTP), inosine  
344 monophosphate (IMP), adenosine monophosphate (AMP), 2'-deoxyuridine (2'-dU), nicotinamide  
345 adenine dinucleotide phosphate (NADP<sup>+</sup>), carnosine, and maleate. Notable changes were  
346 observed in pathways related to the TCA cycle, nucleic acid synthesis, and redox-associated  
347 coenzymes, highlighting the systemic metabolic impact of CCHFV infection.

348 The elevation of metabolites such as SAH underscores the potential impact of methylation  
349 processes on CCHF pathogenesis and prognosis, linking viral replication to host epigenetic  
350 regulation. Similarly, the observed disruptions in purine metabolism, particularly the increased  
351 levels of GTP and IMP, suggest potential therapeutic implications, as these pathways are  
352 targeted by antiviral agents like Ribavirin. The role of other metabolites, such as carnosine and  
353 maleate, indicates a systemic response to oxidative stress and cellular damage, providing further  
354 insight into the host's metabolic adaptation during infection.



355 Our findings align with prior metabolomics studies on other viral hemorrhagic fevers and  
356 highlight the utility of NMR-based metabolomics for uncovering biomarkers that may facilitate  
357 early diagnosis, prognosis prediction, and therapeutic development. The distinct metabolic  
358 profiles observed between moderate and severe CCHF cases further emphasize the relevance of  
359 these biomarkers in stratifying disease severity and monitoring treatment efficacy.

360 This study paves the way for future investigations to validate these biomarkers in larger cohorts  
361 and explore the therapeutic potential of targeting the identified pathways. By advancing the  
362 understanding of CCHF pathogenesis, our results contribute to the development of more  
363 effective diagnostic and therapeutic strategies, ultimately improving patient outcomes in this  
364 severe viral infection.

#### 365 **Author Contributions**

366 **Çağdaş Dağ:** Conceptualization, Methodology, Supervision, Funding acquisition, Writing-  
367 Reviewing and Editing, Writing-Original draft preparation **Kerem Kahraman:** Investigation,  
368 Formal analysis, Visualization, Writing-Reviewing and Editing **Oktay Göcenler:** Investigation,  
369 Formal analysis, Writing-Original Draft, Visualization **Derya Yapar:** Investigation **Yaren**  
370 **Kahraman:** Investigation, Formal analysis **Cengizhan Büyükdag:** Formal analysis, Writing-  
371 Original Draft **Gülen Esken:** Methodology, Investigation **Serena Ozabrahamyan:**  
372 Methodology, Investigation **Tayfun Barlas:** Investigation **Yüksel Karadağ:** Investigation **Aysel**  
373 **Kocagül Çelikbaş:** Investigation **Fusun Can:** Supervision, Investigation **Nurcan Baykam:**  
374 Supervision, Investigation **Mert Kuşkucu:** Supervision, Writing-Reviewing and Editing **Önder**  
375 **Ergönül:** Supervision, Funding acquisition, Conceptualization, Methodology

## 376 ACKNOWLEDGMENT

377 CD acknowledges support from TU□BI□TAK (Project No: 221S353). The authors  
378 acknowledge the use of the services and facilities of n<sup>2</sup>STAR-Koç University Nanofabrication  
379 and Nanocharacterization Center for Scientific and Technological Advanced Research. The  
380 authors gratefully acknowledge use of the services and facilities of the Koc□ University Is Bank  
381 Infectious Disease Center (KUIS-CID). We are also immensely grateful to Firat Kahya, Boran  
382 Saruhan and Oğuzcan Ünver for constructive feedback and for their comments.

## 383 References

- 384 [1] Belhadi, D., Baied, M. E., Mulier, G., Malvy, D., Mentré, F., & Laouénan, C. (2022). The  
385 number of cases, mortality and treatments of viral hemorrhagic fevers: A systematic review.  
386 PLOS Neglected Tropical Diseases, 16(10), e0010889.  
387 <https://doi.org/10.1371/journal.pntd.0010889>
- 388 [2] Hoogstraal H. (1979). The epidemiology of tick-borne Crimean-Congo hemorrhagic fever in  
389 Asia, Europe, and Africa. *Journal of medical entomology*, 15(4), 307–417.  
390 <https://doi.org/10.1093/jmedent/15.4.307>
- 391 [3] Whitehouse, C. A. (2004). Crimean-Congo hemorrhagic fever. *Antiviral Research*, 64(3),  
392 145–160. <https://doi.org/10.1016/j.antiviral.2004.08.001>
- 393 [4] Elaldi, N., Bodur, H., Ascioğlu, S., Celikbas, A. K., Özkurt, Z., Vahaboglu, H.,  
394 Leblebicioglu, H., Yilmaz, N., Engin, A., Şencan, M., Aydin, K., Dokmetas, I., Çevik, M. A.,  
395 Dokuzoğuz, B., Tasyaran, M. A., Öztürk, R., Bakir, M., & Uzun, R. (2009). Efficacy of oral  
396 ribavirin treatment in Crimean-Congo haemorrhagic fever: A quasi-experimental study from  
397 Turkey. *Journal of Infection*, 58(3), 238–244. <https://doi.org/10.1016/j.jinf.2009.01.014>
- 398 [5] Swanepoel, R., Gill, D. E., Shepherd, A. J., Leman, P. A., Mynhardt, J. H., & Harvey, S.  
399 (1989). The clinical pathology of Crimean-Congo hemorrhagic fever. *Reviews of infectious*  
400 *diseases*, 11 Suppl 4, S794–S800. [https://doi.org/10.1093/clinids/11.supplement\\_4.s794](https://doi.org/10.1093/clinids/11.supplement_4.s794)
- 401 [6] Ergonul O. (2008). Treatment of Crimean-Congo hemorrhagic fever. *Antiviral research*,  
402 78(1), 125–131. <https://doi.org/10.1016/j.antiviral.2007.11.002>
- 403 [7] Almayahi, Z. K., Kindi, H. A., Jabri, I. H. S. H. A., Shaqsi, N. H. K. A., Hattali, N. A.,  
404 Hattali, A. A., Quyoodhi, B. A., & Dhuhli, K. A. (2022). Challenges in Diagnosis of Crimean-  
405 Congo Hemorrhagic Fever. *Infectious Diseases in Clinical Practice*, 30(2).  
406 <https://doi.org/10.1097/ipc.0000000000001108>

- 407 [8] Raabe V. N. (2020). Diagnostic Testing for Crimean-Congo Hemorrhagic Fever. *Journal of*  
408 *clinical microbiology*, 58(4), e01580-19. <https://doi.org/10.1128/JCM.01580-19>
- 409 [9] Mayne, E. S., George, J. A., & Louw, S. (2023). Assessing Biomarkers in Viral Infection.  
410 *Advances in experimental medicine and biology*, 1412, 159–173. <https://doi.org/10.1007/978-3->  
411 031-28012-2\_8
- 412 [10] Neogi, U., Elaldi, N., Appelberg, S., Ambikan, A. T., Kennedy, E. V., Dowall, S. D., Bagci,  
413 B., Gupta, S., Murillo, J. R., Akusjärvi, S. S., Monteil, V., Marko-Varga, G., Benfeitas, R.,  
414 Banerjea, A. C., Weber, F., Hewson, R., & Mirazimi, A. (2022). Multi-omics insights into host-  
415 viral response and pathogenesis in Crimean-Congo hemorrhagic fever viruses for novel  
416 therapeutic target. *eLife*, 11. <https://doi.org/10.7554/elife.76071>
- 417 [11] Ak, Ç., Ergönül, Ö. & Gönen, M. A prospective prediction tool for understanding Crimean–  
418 Congo haemorrhagic fever dynamics in Turkey. *Clin. Microbiol. Infect.* 26, 123-e1 (2020).
- 419 [12] Nyamundanda, G., Gormley, I.C., Fan, Y. et al. MetSizeR: selecting the optimal sample size  
420 for metabolomic studies using an analysis based approach. *BMC Bioinformatics* 14, 338 (2013).  
421 <https://doi.org/10.1186/1471-2105-14-338>
- 422 [13] Markley, J. L., Brüschweiler, R., Edison, A. S., Eghbalnia, H. R., Powers, R., Raftery, D., &  
423 Wishart, D. S. (2017). The future of NMR-based metabolomics. *Current opinion in*  
424 *biotechnology*, 43, 34–40. <https://doi.org/10.1016/j.copbio.2016.08.001>
- 425 [14] Emwas, A. M. (2015). The Strengths and Weaknesses of NMR Spectroscopy and Mass  
426 Spectrometry with Particular Focus on Metabolomics Research. In *Methods in molecular biology*  
427 (pp. 161–193). Springer Science+Business Media. [https://doi.org/10.1007/978-1-4939-2377-](https://doi.org/10.1007/978-1-4939-2377-9_13)  
428 9\_13
- 429 [15] Munshi, S. U., Rewari, B. B., Bhavesh, N. S., & Jameel, S. (2013). Nuclear magnetic  
430 resonance based profiling of biofluids reveals metabolic dysregulation in HIV-infected persons  
431 and those on anti-retroviral therapy. *PloS one*, 8(5), e64298.  
432 <https://doi.org/10.1371/journal.pone.0064298>
- 433 [16] Shrinet, J., Shastri, J. S., Gaind, R., Bhavesh, N. S., & Sunil, S. (2016). Serum  
434 metabolomics analysis of patients with chikungunya and dengue mono/co-infections reveals  
435 distinct metabolite signatures in the three disease conditions. *Scientific reports*, 6, 36833.  
436 <https://doi.org/10.1038/srep36833>
- 437 [17] Wang, Z., Liang, H., Cao, H., Zhang, B., Li, J., Wang, W., Qin, S., Wang, Y., Xuan, L., Lai,  
438 L., & Shui, W. (2019). Efficient ligand discovery from natural herbs by integrating virtual  
439 screening, affinity mass spectrometry and targeted metabolomics. *Analyst*, 144(9), 2881–2890.  
440 <https://doi.org/10.1039/c8an02482k>
- 441 [18] Karakus, N., Duygu, F., Rustemoglu, A., & Yigit, S. (2022). Methylene-tetrahydrofolate  
442 reductase gene C677T and A1298C polymorphisms as a risk factor for Crimean-Congo  
443 hemorrhagic fever. *Nucleosides, Nucleotides & Nucleic Acids*, 41(9), 878–890.  
444 <https://doi.org/10.1080/15257770.2022.2085296>

- 445 [19] Byszewska, M., Śmietański, M., Purta, E., & Bujnicki, J. M. (2014). RNA  
446 methyltransferases involved in 5' cap biosynthesis. *RNA Biology*, 11(12), 1597–1607.  
447 <https://doi.org/10.1080/15476286.2015.1004955>
- 448 [20] Brecher, M., Chen, H. S., Liu, B., Banavali, N. K., Jones, S., Zhang, J., Li, Z., Kramer, L.  
449 D., & Li, H. (2015b). Novel Broad Spectrum Inhibitors Targeting the Flavivirus  
450 Methyltransferase. *PLOS ONE*, 10(6), e0130062. <https://doi.org/10.1371/journal.pone.0130062>
- 451 [21] Valle, C., Martin, B., Ferron, F., Roig-Zamboni, V., Desmyter, A., Debart, F., Canard, B.,  
452 Coutard, B., & Decroly, E. (2021). First insights into the structural features of Ebola virus  
453 methyltransferase activities. *Nucleic Acids Research*, 49(3), 1737–1748.  
454 <https://doi.org/10.1093/nar/gkaa1276>
- 455 [22] Tchesnokov, E. P., Bailey-Elkin, B. A., Mark, B. L., & Götte, M. (2020). Independent  
456 inhibition of the polymerase and deubiquitinase activities of the Crimean-Congo Hemorrhagic  
457 Fever Virus full-length L-protein. *PLOS Neglected Tropical Diseases*, 14(6), e0008283.  
458 <https://doi.org/10.1371/journal.pntd.0008283>
- 459 [23] Robins, R. K., Revankar, G. R., McKernan, P. A., Murray, B. K., Kirsi, J. J., & North, J. A.  
460 (1985). The importance of IMP dehydrogenase inhibition in the broad spectrum antiviral activity  
461 of ribavirin and selenazofurin. *Advances in Enzyme Regulation*, 24, 29–43.  
462 [https://doi.org/10.1016/0065-2571\(85\)90068-8](https://doi.org/10.1016/0065-2571(85)90068-8)
- 463 [24] Rothan, H. A., Abdulrahman, A. Y., Khazali, A. S., Rashid, N. N., Chong, T. T., & Yusof,  
464 R. (2019). Carnosine exhibits significant antiviral activity against Dengue and Zika virus.  
465 *Journal of Peptide Science*, 25(8). <https://doi.org/10.1002/psc.3196>
- 466 [25] Saadah, L. M., Deiab, G. I. A., Al-Balas, Q., & Basheti, I. A. (2020). Carnosine to Combat  
467 Novel Coronavirus (nCoV): Molecular Docking and Modeling to Cocrystallized Host  
468 Angiotensin-Converting Enzyme 2 (ACE2) and Viral Spike Protein. *Molecules*, 25(23), 5605.  
469 <https://doi.org/10.3390/molecules25235605>
- 470 [26] Chon, J., Stover, P. J., & Field, M. S. (2017). Targeting nuclear thymidylate biosynthesis.  
471 *Molecular Aspects of Medicine*, 53, 48–56. <https://doi.org/10.1016/j.mam.2016.11.005>
- 472 [27] De Clercq E. (2005). Potential clinical applications of the CXCR4 antagonist bicyclam  
473 AMD3100. *Mini reviews in medicinal chemistry*, 5(9), 805–824.  
474 <https://doi.org/10.2174/1389557054867075>
- 475 [28] Yen, Y. C., Kong, L. X., Lee, L., Zhang, Y. Q., Li, F., Cai, B. J., & Gao, S. Y. (1985).  
476 Characteristics of Crimean-Congo hemorrhagic fever virus (Xinjiang strain) in China. *The*  
477 *American journal of tropical medicine and hygiene*, 34(6), 1179–1182
- 478 [29] National Center for Biotechnology Information (2023). PubChem Compound Summary for  
479 CID 444266, Maleic Acid. Retrieved August 15, 2023 from  
480 <https://pubchem.ncbi.nlm.nih.gov/compound/Maleic-Acid>

481 [30] Bergeron, M. G., Mayers, P., & Brown, D. T. (1996). Specific effect of maleate on an apical  
 482 membrane glycoprotein (gp330) in proximal tubule of rat kidneys. *American Journal of*  
 483 *Physiology-renal Physiology*, 271(4), F908–F916.  
 484 <https://doi.org/10.1152/ajprenal.1996.271.4.f908>

485

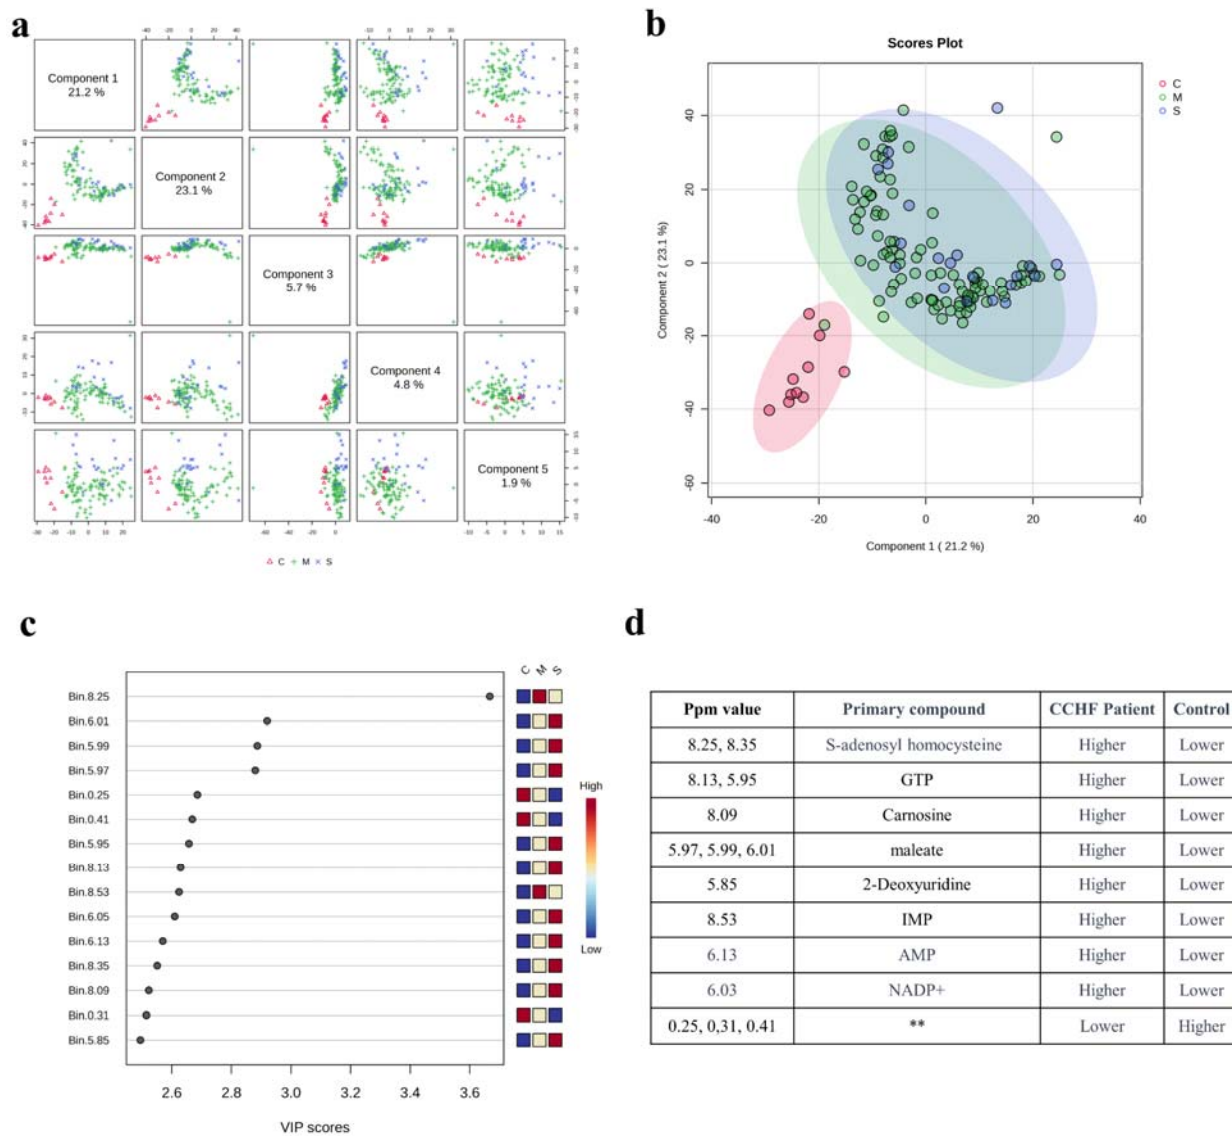

486

487 **Figure 1** PLS-DA analysis of patient samples with severe and moderate infection level for four  
 488 consecutive days with the control group (S: severe, M: moderate, C: Control) a. Matching score  
 489 plots for the first five components of the PLS-DA analysis of all samples. b. partial Least  
 490 Squares Discriminant Analysis score plot. c. Variable importance score plot in PLS-DA VIP  
 491 Projection. d. corresponding compounds in detected increases on the spectra. Component 1:  
 492 accuracy=0.817, (R2=0.246, Q2=0.142), component 2: accuracy=0.833, (R2=0.394, Q2=0.210),



493 component 3: accuracy=0.809, (R2=0.545, Q2=0.225), component 4: accuracy=0.777,  
 494 (R2=0.644, Q2=0.250), component 5: accuracy=0.769, (R2=0.782, Q2=0.205)  
 495

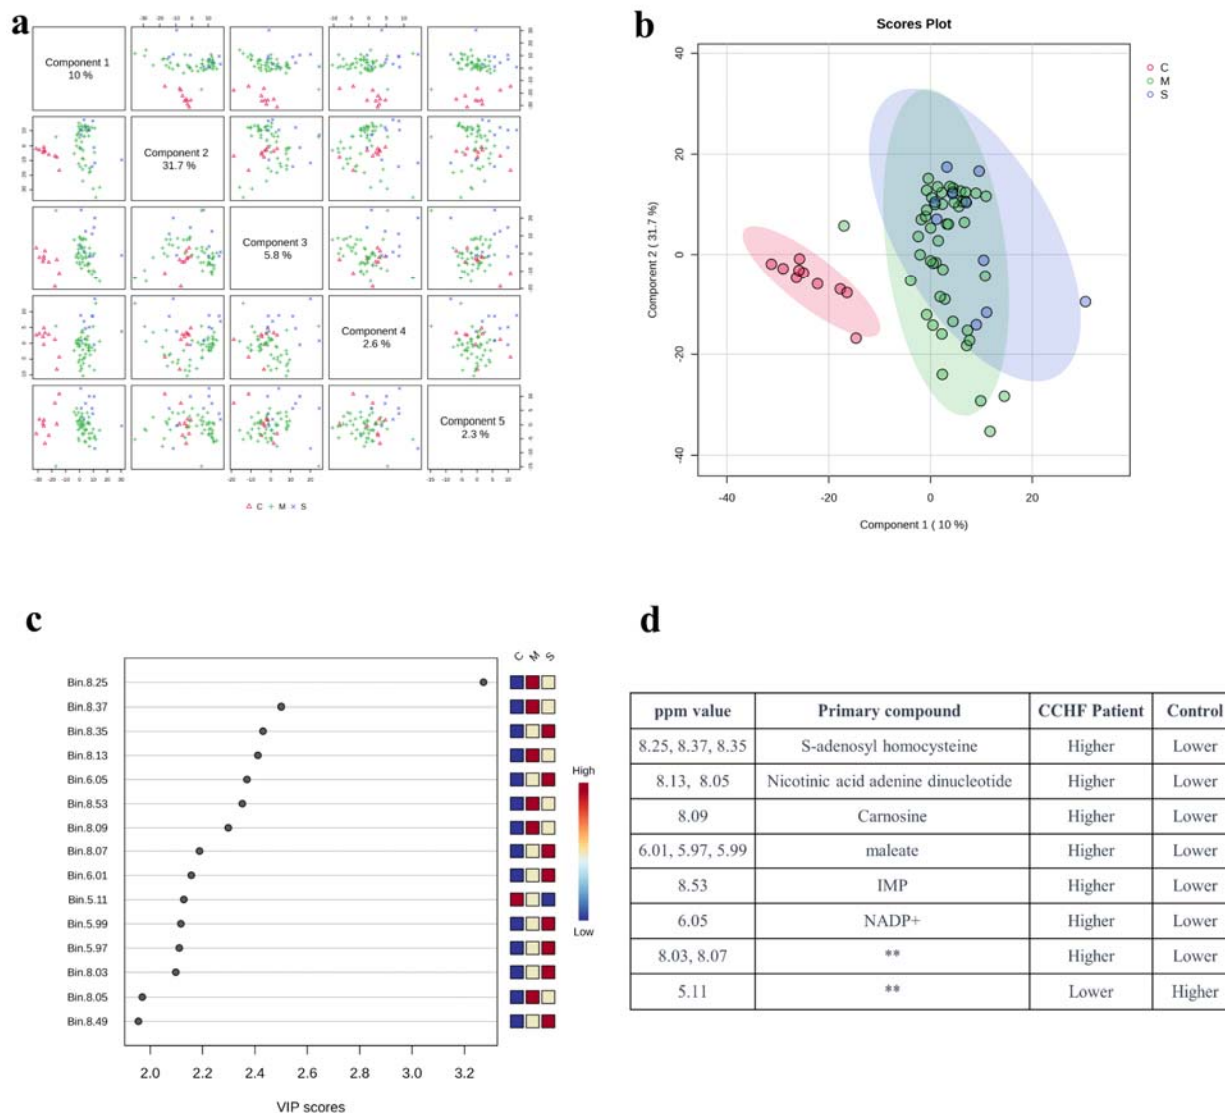

496

497

498 **Figure 2** PLS-DA analysis of patient samples with severe and moderate infection level for first  
 499 two days with the control group matching score plots for the first five components of the PLS-  
 500 DA analysis of samples from day 1 and day 2 as labeled mild (M), severe (S) and compared with  
 501 the control group (C). b, partial Least Squares Discriminant Analysis score plot. c, Variable  
 502 importance score plot in PLS-DA VIP Projection. d, corresponding compounds in detected  
 503 increases on the spectra. Component 1: accuracy=0.0837, (R2=0.585, Q2=0.417), component 2:  
 504 accuracy=0.821, (R2=0.627, Q2=0.433), component 3: accuracy=0.793, (R2=0.804, Q2=0.352)  
 505

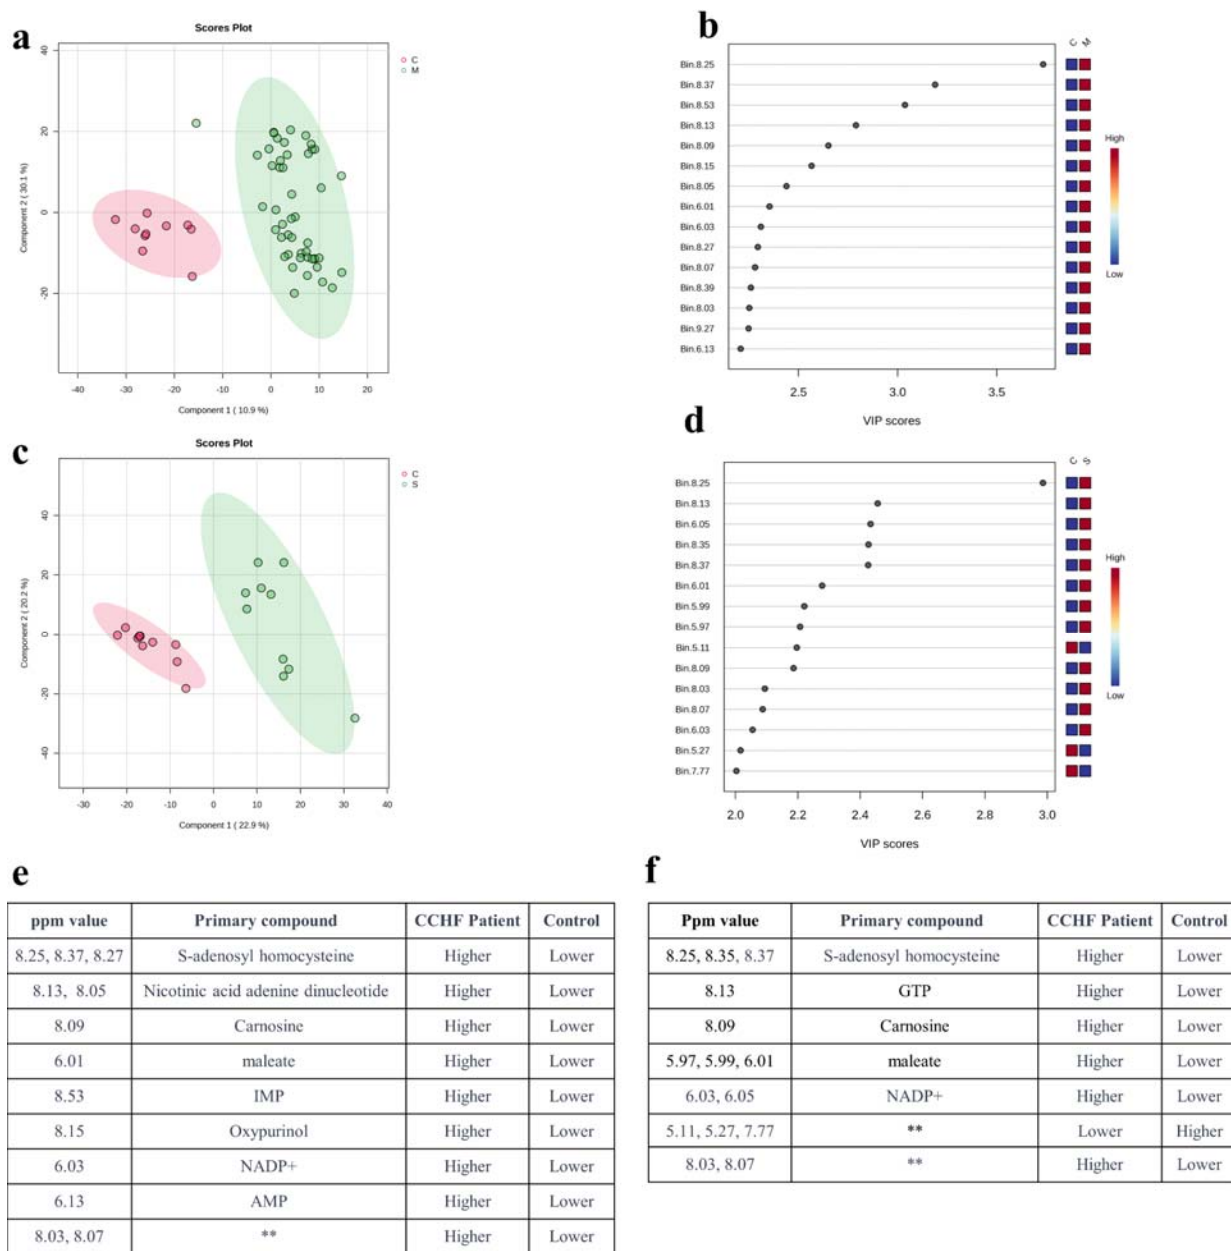

506

507 **Figure 3** PLS-DA analysis of patient samples with moderate infection level for first two days  
 508 with the control group and PLS-DA analysis of patient samples with severe infection level for  
 509 first two days with the control group (S:severe, M: moderate, C:Control) a, partial Least Squares  
 510 Discriminant Analysis score plot. Component 1: accuracy=0.983, (R2=0.821, Q2=0.739),  
 511 component 2: accuracy=0.983, (R2=0.860, Q2=0.790), component 3: accuracy=0.983,  
 512 (R2=0.954, Q2=0.829) b, Variable importance score plot in PLS-DA VIP Projection. c, partial  
 513 Least Squares Discriminant Analysis score plot. Component 1: accuracy=0.950, (R2=0.857,  
 514 Q2=0.702), component 2: accuracy=1, (R2=0.938, Q2=0.797), component 3: accuracy=1,  
 515 (R2=0.982, Q2=0.824) d, Variable importance score plot in PLS-DA VIP Projection. e,  
 516 corresponding compounds in detected increases on the spectra. f, corresponding compounds in  
 517 detected increases on the spectra.
